# Supplementary material for: Rational design of metal–organic frameworks with anticipated porosities and functionalities
Source: Royal Society of Chemistry journal article supplement (doi:10.1039/c4ce00321g), 2014-01-01
Supplement: c4ce00321g1.pdf [file c4ce00321g1.pdf]

Electronic Supplementary Information

**Rational design of metal-organic frameworks with  
anticipated porosities and functionalities**

**Muwei Zhang,<sup>a</sup> Mathieu Bosch,<sup>a</sup> Thomas Gentle III,<sup>a</sup> Hong-Cai Zhou<sup>\*ab</sup>**

*<sup>a</sup> Address: Department of Chemistry, Texas A&M University, College Station, Texas, U.S.A 77842*

Email: zhou@mail.chem.tamu.edu Fax: +1 979 845 1595; Tel: +1 979 845 4034

*<sup>b</sup> Address: Department of Materials Science and Engineering, Texas A&M University, College  
Station, Texas, U.S.A 77842*

**Contents**

**Section 1. The Chemical Structure of MOF Ligands**

**Section 2. Abbreviations and Acronyms**

**Section 3. High-Resolution Pictures of Some Selected MOF Structures**

**Section 4. Funding Resources of All Contributors**

## Section 1. The Chemical Structure of MOF Ligands

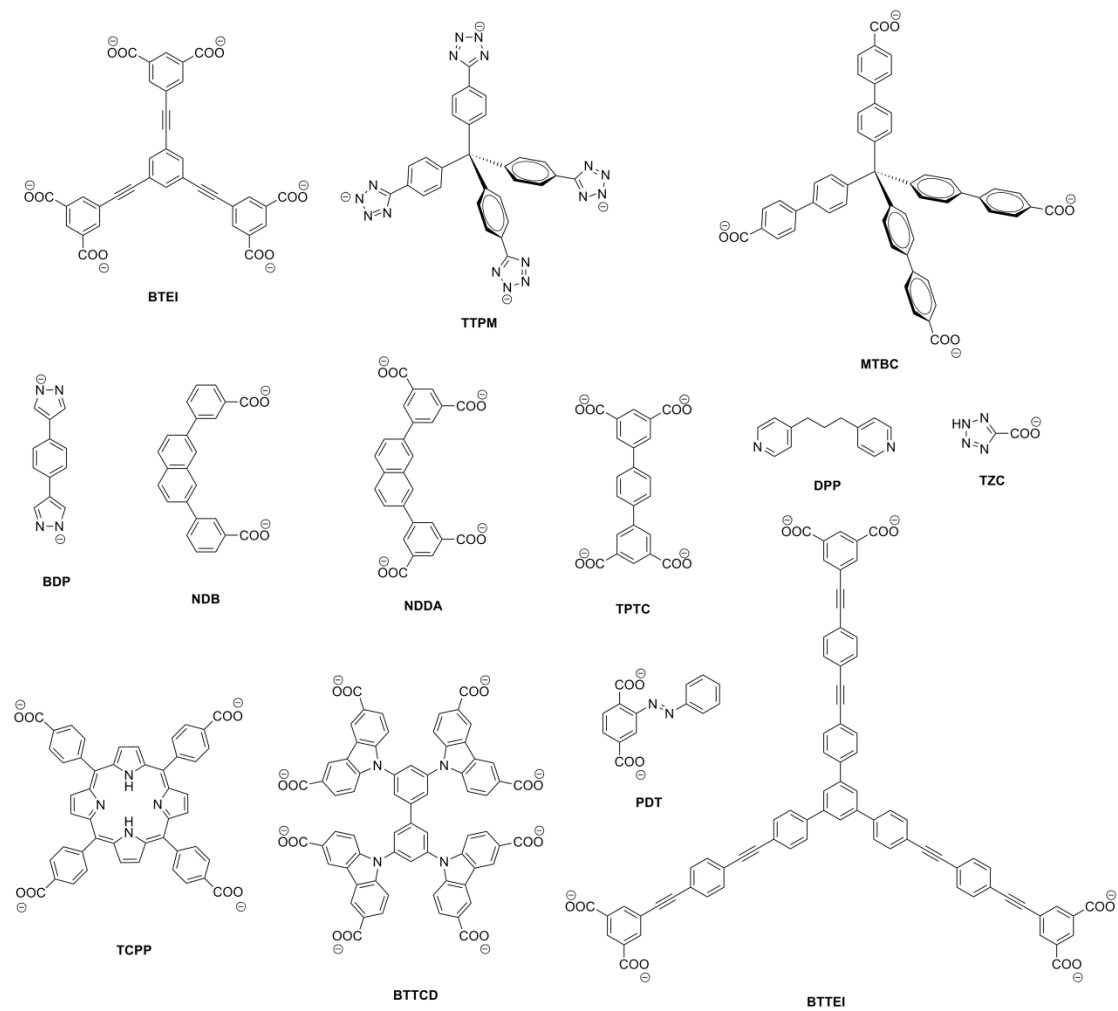

**Scheme S1** The chemical structure of all the ligands mentioned in this review

## **Section 2. Abbreviations and Acronyms**

IMP: Imperial College London (Nomenclature of a series of MOFs)

MOF: Metal-Organic Framework

MOP: Metal-Organic Polyhedra

NU: Northwestern University (Nomenclature of a series of MOFs)

PCN: Porous Coordination Network

PCP: Porous Coordination Polymer

PSM: Post-Synthetic Modification

SBU: Secondary Building Unit

SMT: Single Molecular Trap

UiO: University of Oslo (Nomenclature of a series of MOFs)

UMC: Unsaturated Metal Center

### Section 3. High-Resolution Pictures of Some Selected MOF Structures

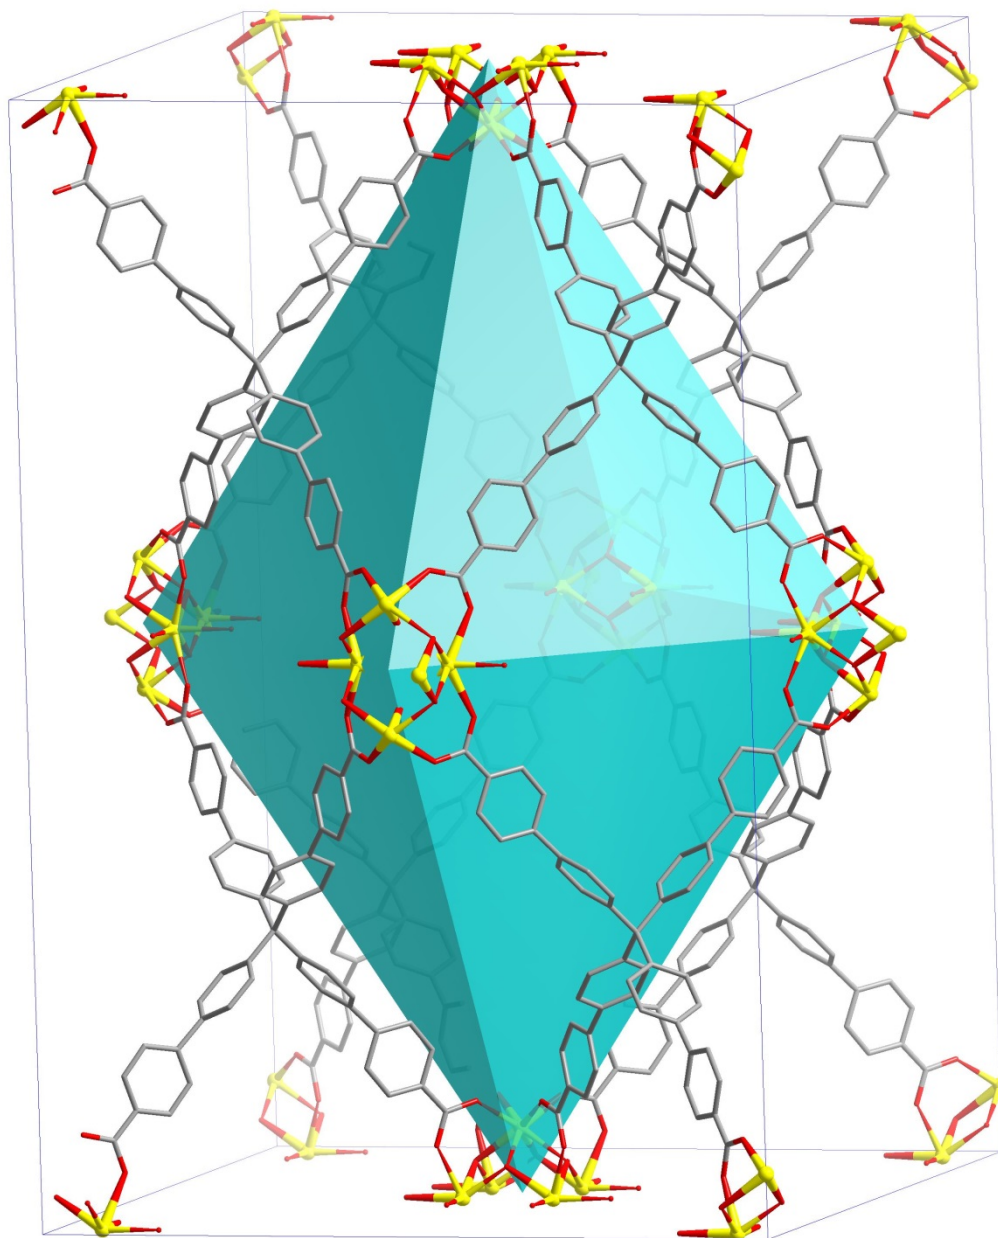

**Figure S1** The crystal structure of PCN-521

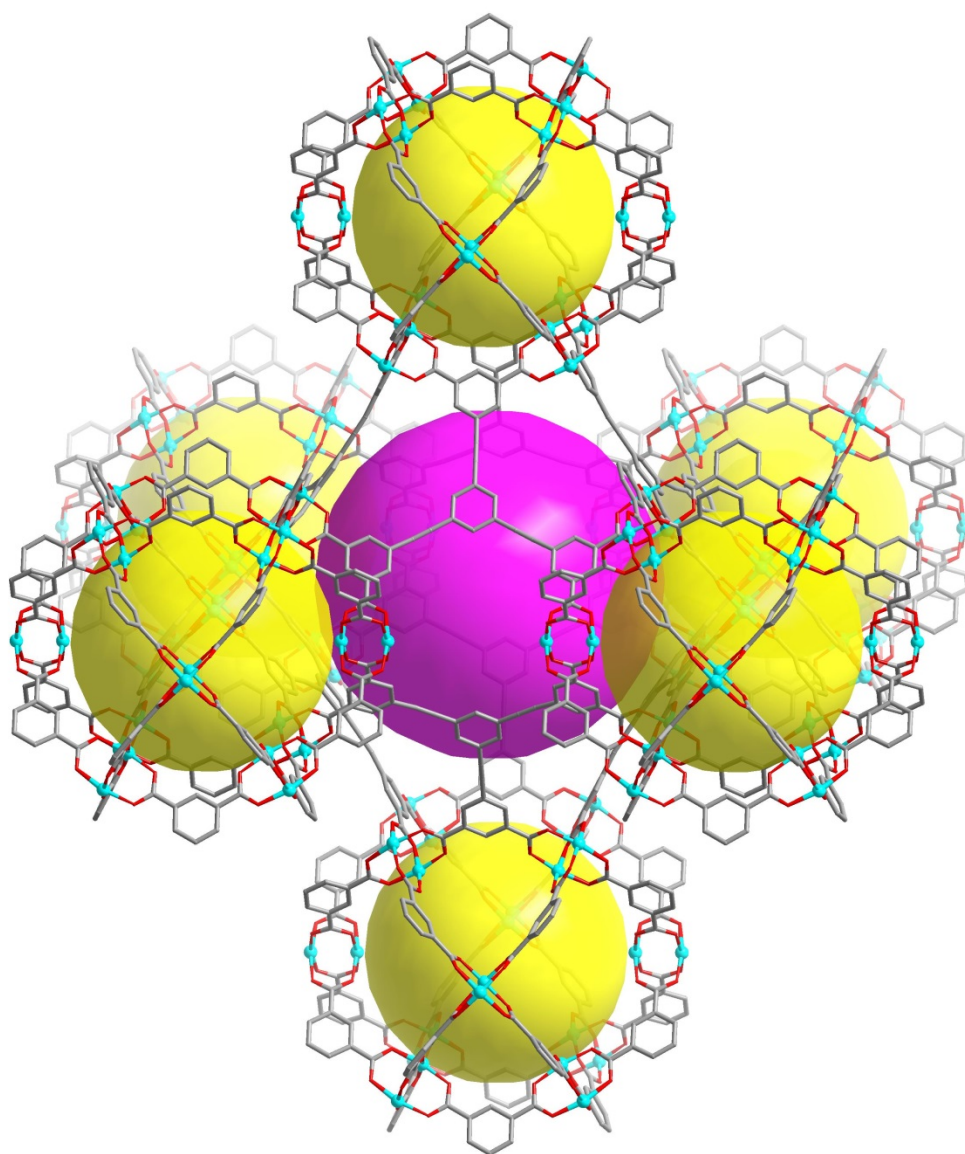

**Figure S2** The crystal structure of PCN-61

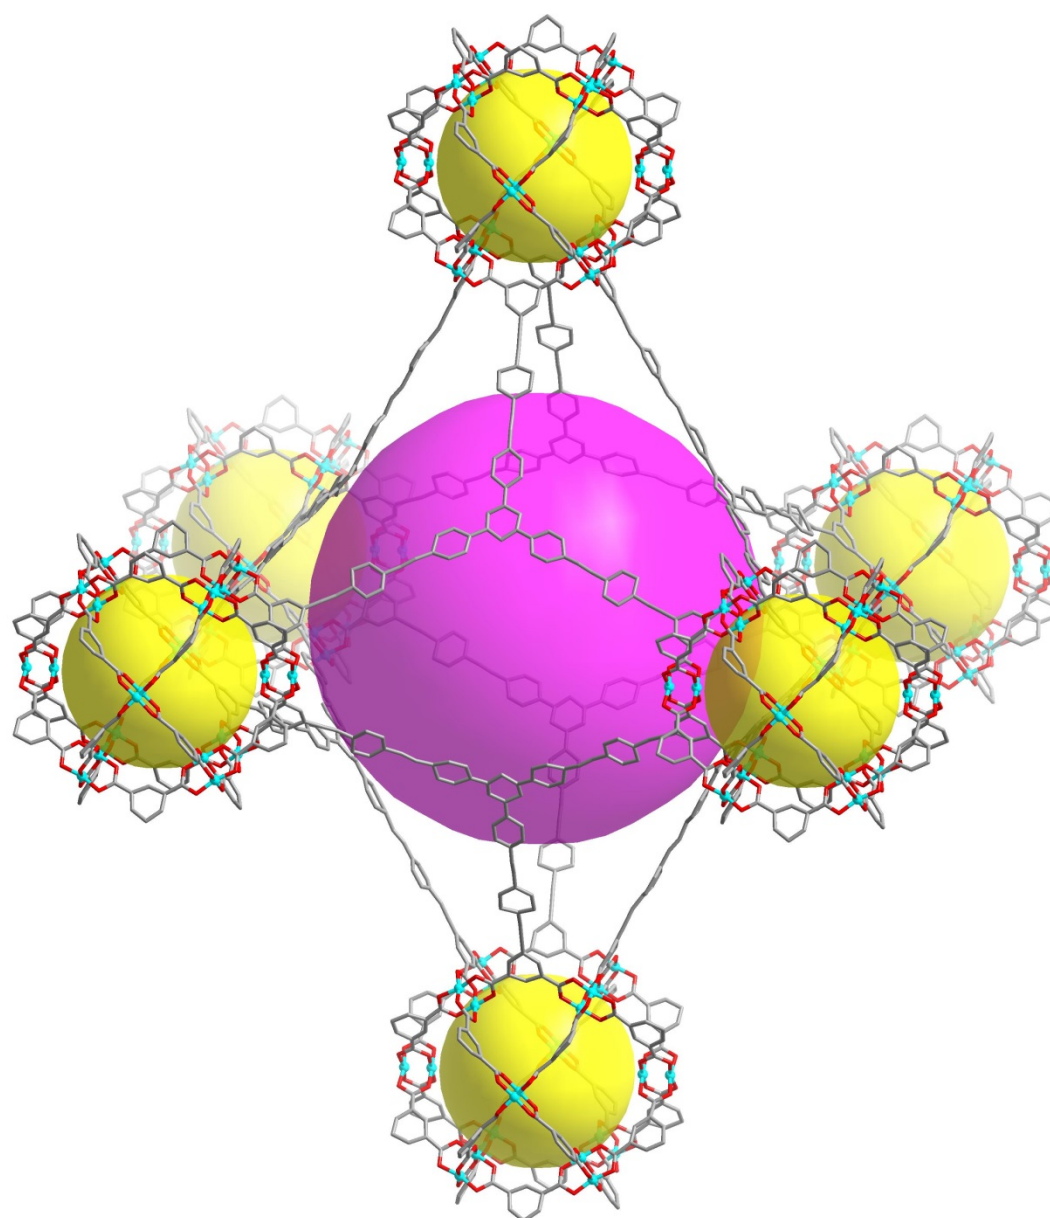

**Figure S3** The crystal structure of NU-110

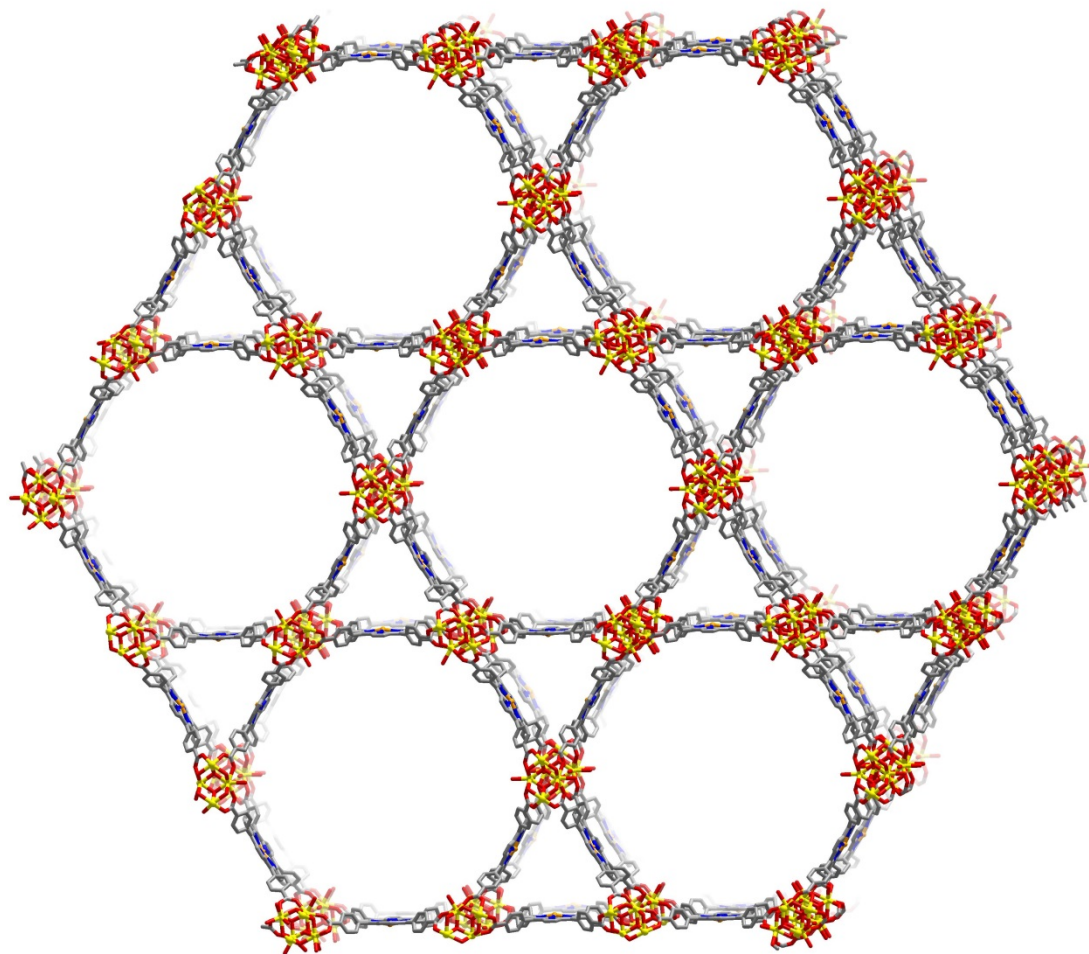

**Figure S4** The crystal structure of PCN-222

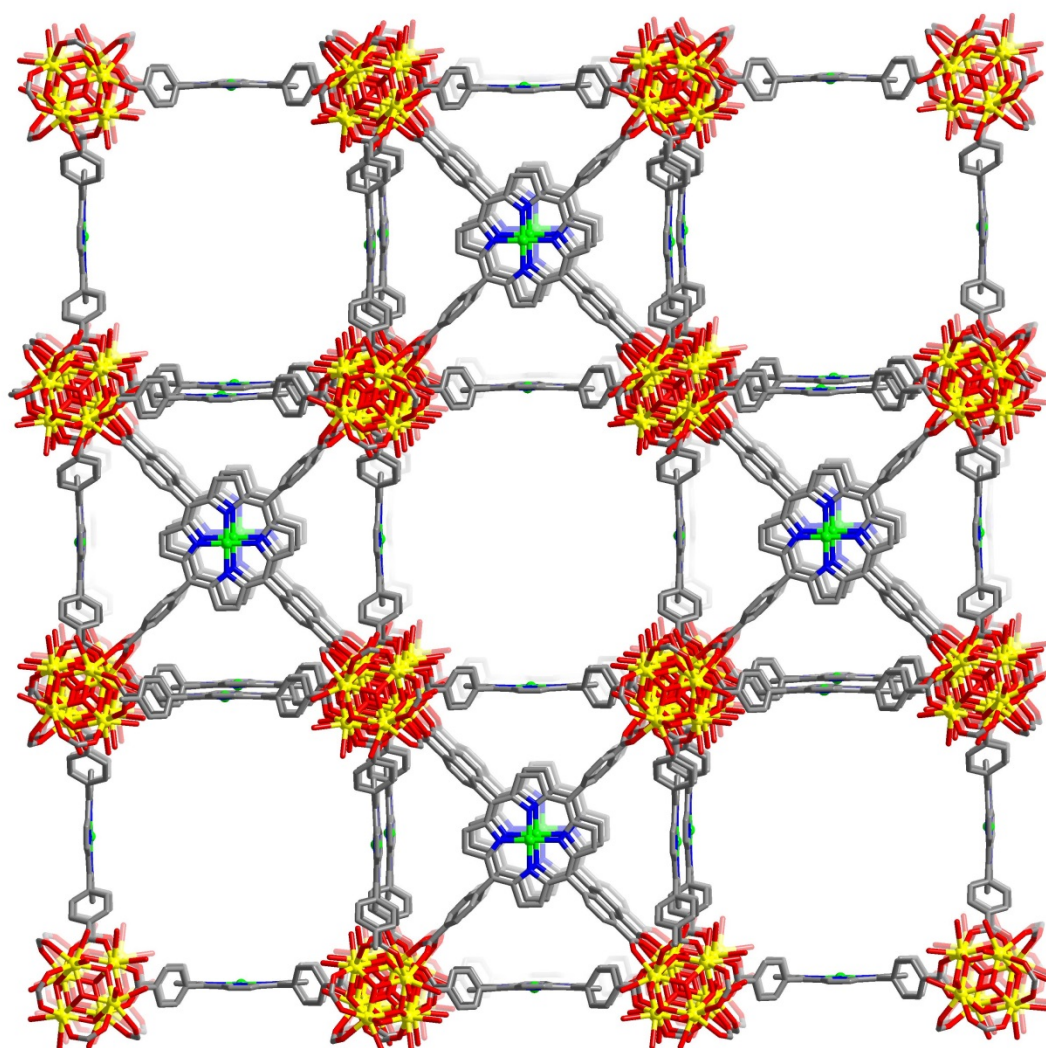

**Figure S5** The crystal structure of PCN-224



#### **Section 4. Funding Resources of All Contributors**

M. Z. was supported by the Chemistry Department at Texas A&M University.

M. B. was supported by the Chemistry Department at Texas A&M University and the Texas A&M graduate merit fellowship.

T. G. was supported by the Chemistry Department at Texas A&M University.
